# Supplementary material for: New process for producing butane-2,3-dione by oxidative dehydrogenation of 3-hydroxybutanone
Source: Royal Society of Chemistry journal article supplement (doi:10.1039/c9re00045c), 2019-01-01
Supplement: c9re00045c1.pdf [file c9re00045c1.pdf]

### Supplementary data

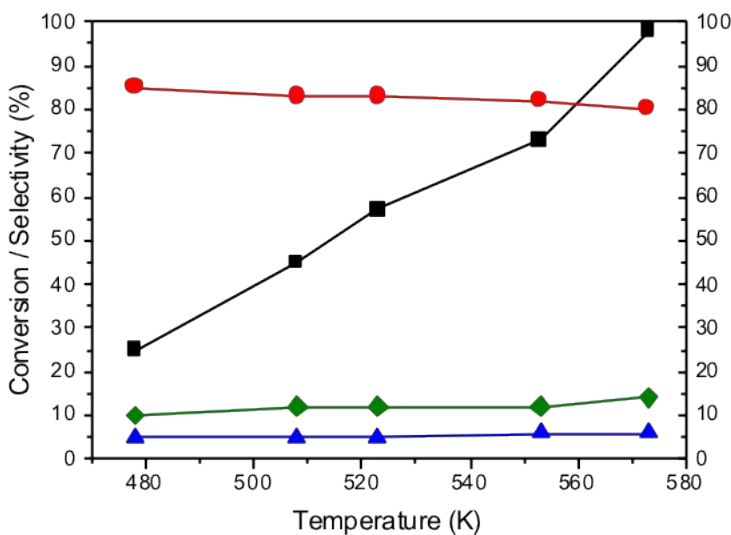

K

**Fig. S1:** Variation of acetoin conversion (■) and selectivity to diacetyl (●), CO<sub>x</sub> (□) and acetic acid (◆) as a function of temperature on the WV-2 catalyst; acetoin/O<sub>2</sub>/N<sub>2</sub>=1.3/20.4/78.3 m<sub>cat</sub>=170 mg.

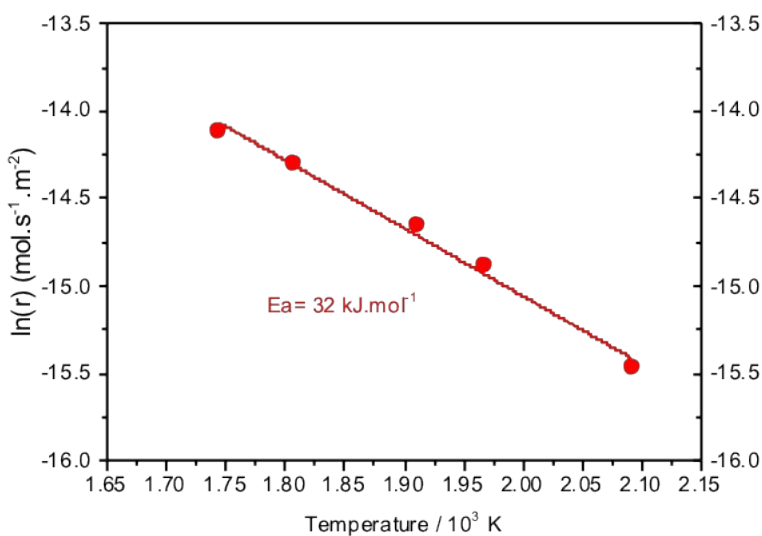

**Fig. S2:** Rate constant for acetoin conversion as a function of reciprocal temperature on WV-1; acetoin/O<sub>2</sub>/N<sub>2</sub>=1.3/20.4/78.3
